# Supplementary figures and images for: Employing Genome Mining to Unveil a Potential Contribution of Endophytic Bacteria to Antimicrobial Compounds in the Origanum vulgare L. Essential Oil
Source: MDPI journal article supplement (doi:10.3390/antibiotics12071179), 2023-07-12

# CAROTENOID BIOSYNTHESIS

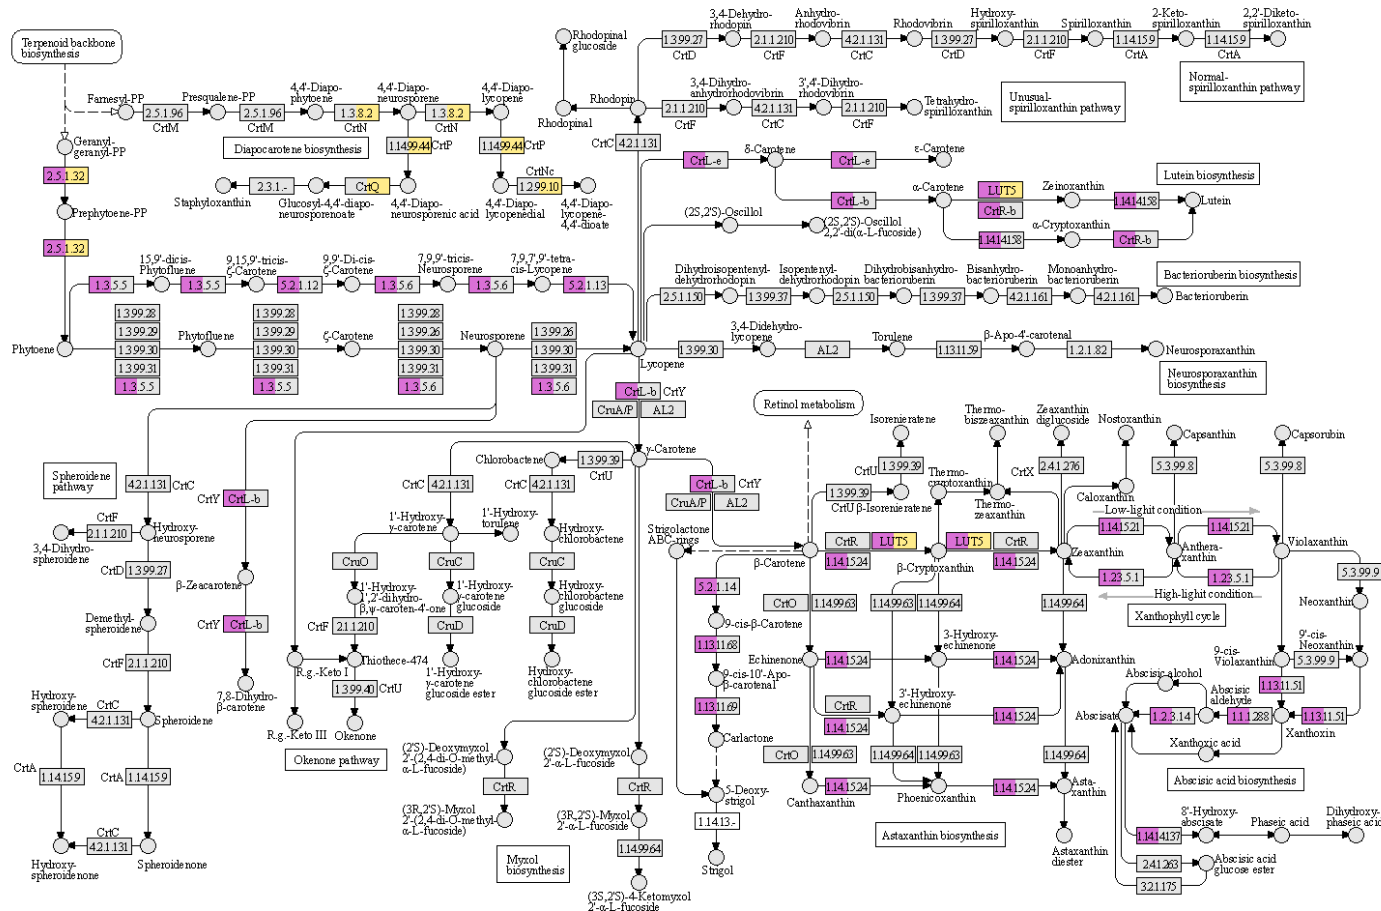

Supplement: s1 [file s1]
